# See and Hear What the Field Is Discussing!

*Psychiatric Services* features research related to the delivery of mental health services, especially for people with serious mental illness in community-based treatment programs. Provision of high-quality care involves collaboration among a variety of professionals. Clinicians, administrators, and policy makers look to *Psychiatric Services* for research on how to deliver evidence-based treatments, to take an integrated “whole-health” approach to care, and to better engage individuals in their care. Mental health’s current focus on patient-centered, recovery-oriented care and on dissemination of evidence-based practices is transforming service delivery systems at all levels. Research published in *Psychiatric Services* contributes to this transformation.

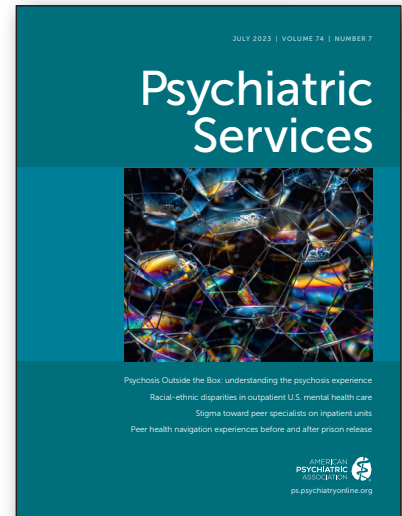

## Our Most Talked About Articles in 2023:

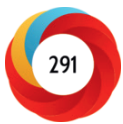

### Established Outpatient Care and Follow-Up After Acute Psychiatric Service Use Among Youths and Young Adults

January issue

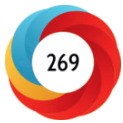

### Mental Health Emergency Hotlines in the United States: A Scoping Review (2012–2021)

May issue

## The Discussion Continues: *Psychiatric Services*’ Podcast “From Pages to Practice”

Editor Lisa Dixon, M.D., M.P.H., and Podcast Editor and co-host Josh Berezin, M.D., M.S., discuss the latest mental health services research published in *Psychiatric Services* and why it is relevant. Topics include community-based treatment programs, collaborative care, evidence-based treatment and service delivery, criminal and social justice, policy analysis, and more.

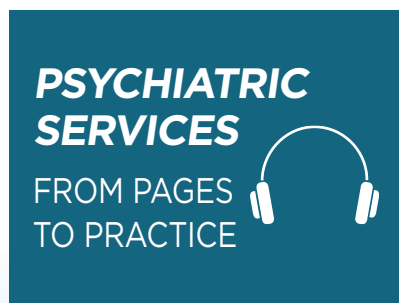

### Guidance for Handling the Increasing Prevalence of Drugs Adulterated or Laced With Fentanyl

Joseph Parks, M.D., discusses guidelines for clinicians in how to deal with the increased prevalence of drugs adulterated with fentanyl and similar potent fentanyl analogs.

### Psychiatrist and Nonpsychiatrist Physician Network Breadth in Dual Eligible Special Needs Plans

Eric P. Slade, Ph.D., discusses the complex and often confusing world of dual eligibility for Medicare and Medicaid coverage when it comes to mental health services, in particular Dual Eligible Special Needs Plans (D-SNPs), a type of Medicare Advantage plan designed around those eligible for both programs.
