# Psychiatric Services

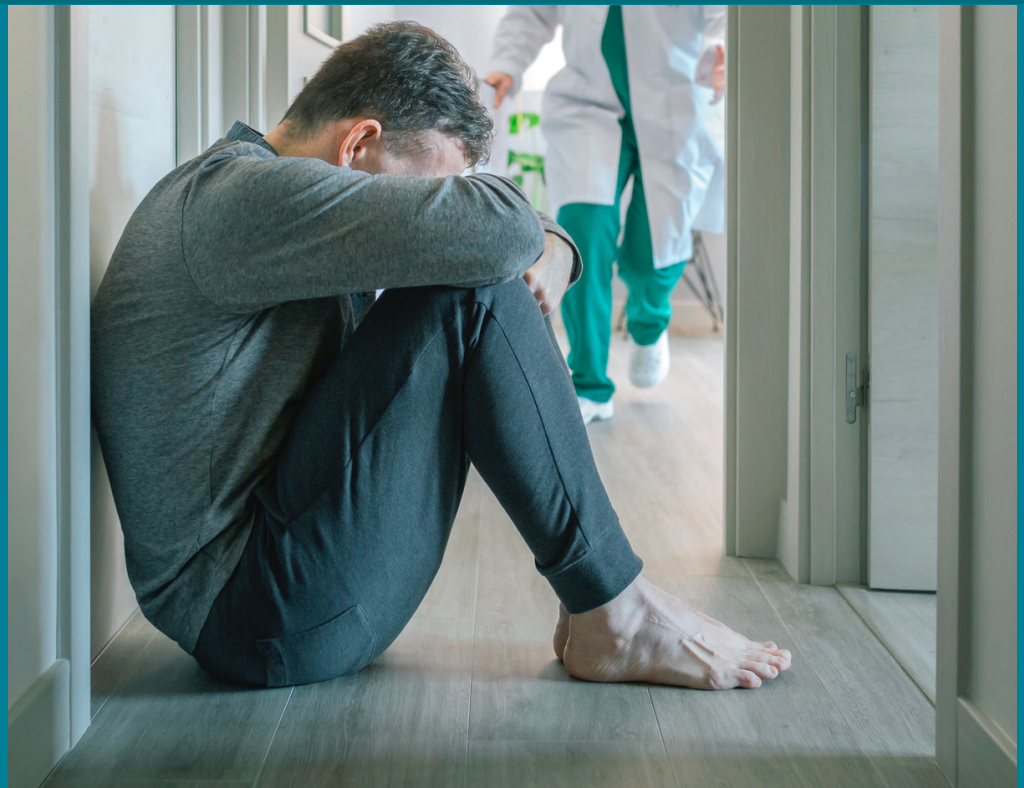

Mental health consumer and family preferences for crisis response

Postmarket surveillance for effective regulation of digital mental health treatments

A layperson-delivered telephone program for depression

Clinical outcomes of veterans receiving unconditional cash transfers
